# Supplementary material
Source: publisher figshare collection journal article supplement (https://tandf.figshare.com/articles/dataset/_/19213732)
Supplement: Supplementary file 1 [file 1]

## Sheet: Sheet1
dates	quarters	AWHMAN	CPIAUCSL	INDPRO	DPCERA3M086SBEA	FEDFUNDS	GS10	S&P 500	UE	GDPE	GDPI
1960	0	4.06	-0.136101	2.59156	0.278366	3.99	4.72	-1.75938	-0.052646	8.88967	8.79791
1960.08	0	4.03	0.136101	-0.89369	0.432709	3.97	4.49	-3.95447	-0.413811	8.88967	8.79791
1960.17	1	4	0	-0.901749	1.40716	3.84	4.25	-1.37186	0.619242	8.88967	8.79791
1960.25	0	4	0.441052	-0.796117	1.53824	3.92	4.28	1.28218	-0.244729	-2.16339	-0.0686977
1960.33	0	4.01	0.101506	-0.11425	-2.04166	3.85	4.35	-0.91934	-0.0767605	-2.16339	-0.0686977
1960.42	1	3.99	0.135181	-1.26502	-0.0219455	3.32	4.15	3.62771	0.259119	-2.16339	-0.0686977
1960.5	0	3.99	-0.20284	-0.347917	0.202812	3.23	3.9	-2.51118	0.114958	1.95233	0.0141806
1960.58	0	3.97	0.20284	-0.116242	-0.0931328	2.98	3.8	1.19272	0.149941	1.95233	0.0141806
1960.67	1	3.94	0	-1.05188	0.47571	2.6	3.8	-3.0545	-0.113348	1.95233	0.0141806
1960.75	0	3.97	0.471699	-0.117608	0.484315	2.47	3.89	-1.99012	0.54774	-5.16696	-2.17709
1960.83	0	3.93	0.10079	-1.42177	-0.348035	2.44	3.93	3.18708	0.0627944	-5.16696	-2.17709
1960.92	1	3.84	0.100688	-1.92783	-1.23326	1.98	3.84	2.3694	0.411542	-5.16696	-2.17709
1961	0	3.93	0.100587	0.121612	0.242371	1.45	3.84	5.01306	0.0718121	2.69104	0.81395
1961.08	0	3.94	0	-0.121612	0.36794	2.54	3.78	4.02056	0.23117	2.69104	0.81395
1961.17	1	3.95	0	0.606587	1.23663	2.02	3.74	3.08838	0.00223672	2.69104	0.81395
1961.25	0	3.95	-0.100587	2.03444	0.0487158	1.49	3.78	2.63193	0.0995157	6.73293	6.69566
1961.33	0	3.97	0.100587	1.52852	0.604264	1.98	3.71	1.01263	0.137849	6.73293	6.69566
1961.42	1	4	0	1.39047	0.24176	1.73	3.88	-1.33214	-0.209164	6.73293	6.69566
1961.5	0	4	0.267738	1.14448	-0.300946	1.17	3.92	-0.274684	0.0943789	7.60579	6.39684
1961.58	0	4.01	0.0668226	0.905835	0.359954	2	4.04	3.5281	-0.34857	7.60579	6.39684
1961.67	1	3.95	0.133511	-0.112833	0.556181	1.88	3.98	-0.784899	0.0214225	7.60579	6.39684
1961.75	0	4.03	0	1.90065	0.627328	2.26	3.92	1.0942	-0.172095	7.76851	9.36761
1961.83	0	4.07	0	1.53849	0.959923	2.61	3.94	4.42983	-0.384328	7.76851	9.36761
1961.92	1	4.04	0.100017	0.868461	0.690488	2.33	4.06	0.924247	-0.142347	7.76851	9.36761
1962	0	4	0.0999167	-0.868461	0.0312728	2.15	4.08	-3.7928	-0.146285	7.07152	4.81941
1962.08	0	4.04	0.232752	1.62257	-0.0469129	2.37	4.04	1.65127	-0.316425	7.07152	4.81941
1962.17	1	4.06	0.199071	0.535185	0.825571	2.85	3.93	0.099637	0.0706182	7.07152	4.81941
1962.25	0	4.06	0.132494	0.21289	0.345851	2.78	3.84	-3.23868	-0.0105678	3.59845	4.41996
1962.33	0	4.06	0.0992556	-0.106581	0.764871	2.36	3.87	-7.72667	-0.0824554	3.59845	4.41996
1962.42	1	4.05	-0.0992556	-0.213117	-0.502411	2.68	3.91	-12.4253	-0.0240719	3.59845	4.41996
1962.5	0	4.05	0.0330961	0.956809	0.328391	2.71	4.01	2.38022	-0.0191218	4.88409	4.02696
1962.58	0	4.05	0.198347	0.105792	0.271135	2.93	3.98	2.68438	0.221348	4.88409	4.02696
1962.67	1	4.05	0.461286	0.632031	1.11767	2.9	3.98	-0.892557	-0.0867486	4.88409	4.02696
1962.75	0	4.03	-0.131579	0.105014	-0.496329	2.9	3.93	-3.20602	-0.20427	1.31328	4.65967
1962.83	0	4.05	0	0.418958	1.31644	2.94	3.92	6.66282	0.315315	1.31328	4.65967
1962.92	1	4.03	0	0	0.559638	2.93	3.86	4.2393	-0.163766	1.31328	4.65967
1963	0	4.05	0.197304	0.728605	-0.0299013	2.92	3.83	3.79059	0.212097	4.34276	3.44947
1963.08	0	4.05	0.13132	1.13491	-0.374523	3	3.92	1.3132	0.220816	4.34276	3.44947
1963.17	1	4.05	0.0983768	0.613289	0.504031	2.98	3.93	-0.379969	-0.245824	4.34276	3.44947
1963.25	0	4.05	-0.0983768	0.913486	0.362724	2.9	3.97	4.598	-0.045499	4.4635	5.78066
1963.33	0	4.05	0.0983768	1.20478	0.064457	3	3.93	1.98711	0.214897	4.4635	5.78066
1963.42	1	4.07	0.327225	0.299031	0.961902	2.99	3.99	-0.0427807	-0.31819	4.4635	5.78066
1963.5	0	4.06	0.261012	-0.398907	0.51414	3.02	4.02	-1.4945	0.0773763	8.69844	5.36447
1963.58	0	4.06	0.195313	0.199653	0.351032	3.49	4	2.72777	-0.227662	8.69844	5.36447
1963.67	1	4.06	-0.0976086	0.991971	-0.185113	3.48	4.08	2.60044	0.0836846	8.69844	5.36447
1963.75	0	4.07	0.0976086	0.688465	-0.058528	3.5	4.11	0.246778	0.0301203	2.61382	3.45837
1963.83	0	4.07	0.0975134	0.489126	0.743679	3.48	4.12	-0.562995	0.216028	2.61382	3.45837
1963.92	1	4.06	0.32436	-0.195364	1.18424	3.38	4.13	2.11194	-0.225545	2.61382	3.45837
1964	0	4.01	0.194112	0.876146	0.324893	3.48	4.17	3.02772	0.0618458	8.34545	6.60714
1964.08	0	4.07	-0.0970089	0.675831	0.703492	3.48	4.15	1.22206	-0.158508	8.34545	6.60714
1964.17	1	4.06	0.0970089	0	0.349899	3.43	4.22	1.80554	0.0225229	8.34545	6.60714
1964.25	0	4.07	0.0323154	1.62302	0.174491	3.47	4.23	1.43634	-0.0852626	4.33128	5.87247
1964.33	0	4.08	0.0968836	0.566721	1.37578	3.5	4.2	0.971002	-0.218639	4.33128	5.87247
1964.42	1	4.08	0.0967898	0.281821	0.570013	3.5	4.17	-0.596423	0.0939535	4.33128	5.87247
1964.5	0	4.08	0.0322425	0.655297	0.736652	3.42	4.19	3.64656	-0.280376	6.20089	5.63082
1964.58	0	4.09	0.0966651	0.650696	0.599119	3.5	4.19	-1.47685	0.0567772	6.20089	5.63082
1964.67	1	4.09	0.0965717	0.370125	-0.42038	3.45	4.2	1.7049	0.0660419	6.20089	5.63082
1964.75	0	4.07	0.128617	-1.39475	0.652657	3.36	4.19	1.71168	0.0178539	1.23367	3.82565
1964.83	0	4.1	0.288786	3.04324	-0.914	3.52	4.15	0.692938	-0.237265	1.23367	3.82565
1964.92	1	4.12	0.128082	1.17381	0.964028	3.85	4.18	-1.74739	0.124313	1.23367	3.82565
1965	0	4.13	0.0959539	1.07139	0.706813	3.9	4.19	2.54012	-0.114408	9.56381	8.82549
1965.08	0	4.13	0	0.619906	1.58118	3.98	4.21	0.728875	0.194994	9.56381	8.82549
1965.17	1	4.13	0.095862	1.31494	0.310601	4.04	4.21	0.0921765	-0.303785	9.56381	8.82549
1965.25	0	4.12	0.223321	0.434708	0.706342	4.09	4.2	1.30437	0.0966714	5.02143	5.06951
1965.33	0	4.13	0.318168	0.777432	-0.0924235	4.1	4.21	1.47817	-0.234371	5.02143	5.06951
1965.42	1	4.12	0.41211	0.771743	-0.835678	4.04	4.21	-4.86558	-0.0571295	5.02143	5.06951
1965.5	0	4.12	-0.0949517	0.934919	1.24872	4.09	4.2	-0.152986	-0.136281	8.79566	5.60394
1965.58	0	4.11	-0.095042	0.421925	0.729627	4.12	4.25	1.84369	-0.0544088	8.79566	5.60394
1965.67	1	4.11	0.221624	0.252485	1.65778	4.01	4.29	3.28681	-0.0443323	8.79566	5.60394
1965.75	0	4.12	0.0948317	1.00361	1.38614	4.08	4.35	2.22391	-0.116925	9.1116	8.65636
1965.83	0	4.13	0.315458	0.414918	-0.0380108	4.1	4.45	0.828162	-0.0912846	9.1116	8.65636
1965.92	1	4.13	0.314466	1.23512	0.202557	4.32	4.62	-0.45682	-0.0721253	9.1116	8.65636
1966	0	4.15	0.0941472	0.977167	0.638738	4.42	4.61	1.7185	-0.0621842	9.62031	8.67244
1966.08	0	4.17	0.625393	0.646374	0.667977	4.6	4.83	-0.677386	-0.211837	9.62031	8.67244
1966.17	1	4.16	0.311236	1.35925	0.775085	4.65	4.87	-4.19734	0.0831803	9.62031	8.67244
1966.25	0	4.18	0.31027	0.158772	0.0536602	4.67	4.75	3.01441	-0.0917381	1.36414	2.65659
1966.33	0	4.15	0.216618	0.947088	-0.936989	4.9	4.78	-5.40551	0.15628	1.36414	2.65659
1966.42	1	4.14	0.0926927	0.470343	0.26208	5.17	4.81	-0.833145	-0.113448	1.36414	2.65659
1966.5	0	4.12	0.215949	0.545671	0.864553	5.3	5.02	-0.255963	0.00082001	3.37336	2.74696
1966.58	0	4.14	0.614441	0.0777506	0.152279	5.53	5.22	-6.23663	0.0160798	3.37336	2.74696
1966.67	1	4.12	0.305811	0.928044	0.921062	5.4	5.18	-3.58488	-0.134613	3.37336	2.74696
1966.75	0	4.13	0.304878	0.690355	-0.441051	5.53	5.01	-0.877765	-0.006904	3.2681	3.52474
1966.83	0	4.12	0.0912825	-0.690355	0.208517	5.76	5.16	4.88334	-0.0562482	3.2681	3.52474
1966.92	1	4.09	0.121581	0.230741	0.159161	5.4	4.84	0.418926	0.183817	3.2681	3.52474
1967	0	4.11	-0.0607718	0.470657	0.47191	4.94	4.58	3.76447	0.073169	3.52675	2.32705
1967.08	0	4.04	0.30349	-1.14075	-0.370017	5	4.63	3.38779	-0.0632901	3.52675	2.32705
1967.17	1	4.05	0	-0.565322	0.520073	4.53	4.54	2.33069	-0.0244312	3.52675	2.32705
1967.25	0	4.04	0.302572	0.938767	0.943822	4.05	4.59	1.70755	-0.0143201	0.245009	2.19513
1967.33	0	4.04	0	-0.876169	-0.00401453	3.94	4.85	1.77613	0.0444829	0.245009	2.19513
1967.42	1	4.04	0.602411	-0.0126286	0.584422	3.98	5.02	-1.26075	0.0569933	0.245009	2.19513
1967.5	0	4.05	0.29985	-0.22787	-0.355851	3.79	5.16	1.71334	-0.0716616	3.76674	4.18191
1967.58	0	4.06	0.298954	1.89777	0.299958	3.9	5.28	1.5787	-0.0108415	3.76674	4.18191
1967.67	1	4.06	0.298063	-0.162423	0.831167	3.99	5.3	1.38731	0.0118367	3.76674	4.18191
1967.75	0	4.06	0.297177	0.811137	-0.943047	3.88	5.48	-0.156683	0.21802	3.00477	4.0147
1967.83	0	4.06	0.591718	1.41994	0.681318	4.13	5.75	-3.18634	-0.0983226	3.00477	4.0147
1967.92	1	4.07	0.294551	1.07134	1.32536	4.51	5.7	2.80929	-0.0761406	3.00477	4.0147
1968	0	4.04	0.293686	-0.10785	0.636684	4.6	5.53	-0.273196	-0.135212	8.0759	5.89108
1968.08	0	4.08	0.292826	0.357893	0.101183	4.71	5.56	-4.61894	0.12631	8.0759	5.89108
1968.17	1	4.08	0.291971	0.311677	1.66256	5.05	5.74	-1.84614	-0.159729	8.0759	5.89108
1968.25	0	4.03	0.291121	0.144586	-0.371769	5.76	5.64	7.12577	-0.215299	6.62802	5.99041
1968.33	0	4.09	0.290276	1.11535	0.684973	6.11	5.87	2.27353	0.0139885	6.62802	5.99041
1968.42	1	4.09	0.578036	0.366768	0.854398	6.07	5.72	2.65177	0.238262	6.62802	5.99041
1968.5	0	4.08	0.574714	-0.153465	0.925863	6.02	5.5	-0.199203	-0.0625934	3.08794	5.39266
1968.58	0	4.07	0.286123	0.278733	0.273107	6.03	5.42	-2.20764	-0.138553	3.08794	5.39266
1968.67	1	4.09	0.285307	0.37799	-0.138331	5.78	5.46	3.19971	-0.106078	3.08794	5.39266
1968.75	0	4.1	0.568183	0.198206	0.16448	5.91	5.58	2.43796	0.00142769	1.57013	2.69916
1968.83	0	4.09	0.282886	1.28526	0.551273	5.82	5.7	1.52967	0.0200907	1.57013	2.69916
1968.92	1	4.07	0.563382	0.315299	-0.245463	6.02	6.03	1.03823	-0.0487097	1.57013	2.69916
1969	0	4.08	0.280505	0.603232	0.804796	6.3	6.04	-4.31722	0.038948	6.21194	3.8776
1969.08	0	4.04	0.27972	0.637761	0.637003	6.61	6.19	-0.491401	-0.0536781	6.21194	3.8776
1969.17	1	4.08	0.834497	0.781186	-0.441421	6.79	6.3	-2.19132	0.0224547	6.21194	3.8776
1969.25	0	4.1	0.552488	-0.368573	0.408382	7.41	6.17	1.99408	0.0487774	1.21418	2.42774
1969.33	0	4.07	0.275103	-0.378774	0.669658	8.67	6.32	3.20571	-0.0494736	1.21418	2.42774
1969.42	1	4.07	0.547947	0.972141	-0.383681	8.9	6.57	-5.36106	0.103681	1.21418	2.42774
1969.5	0	4.06	0.54496	0.526709	-0.135554	8.61	6.72	-4.57134	0.0586791	2.63336	2.69484
1969.58	0	4.06	0.271371	0.229566	0.915981	9.19	6.69	-0.561175	-0.0270015	2.63336	2.69484
1969.67	1	4.06	0.540542	-0.0225854	0.123434	9.15	7.16	0.34978	0.21838	2.63336	2.69484
1969.75	0	4.05	0.537636	0.0292856	0.517489	9	7.1	1.063	0.00168235	-1.95551	-0.837653
1969.83	0	4.05	0.534761	-0.94718	-0.115569	8.85	7.14	0.719765	-0.232651	-1.95551	-0.837653
1969.92	1	4.06	0.531916	-0.268655	-0.0903816	8.97	7.65	-5.44657	0.0245457	-1.95551	-0.837653
1970	0	4.04	0.529102	-1.86907	0.595014	8.98	7.79	-0.881937	0.371289	-0.594381	-2.70758
1970.08	0	4.02	0.526317	-0.0660494	0.437685	8.98	7.24	-3.55027	0.298672	-0.594381	-2.70758
1970.17	1	4.01	0.523561	-0.129922	-0.509619	7.76	7.07	1.69505	0.202932	-0.594381	-2.70758
1970.25	0	3.98	0.520835	-0.257266	0.0755301	8.1	7.39	-3.09303	0.183628	0.567276	0.0716609
1970.33	0	3.98	0.259404	-0.116784	0.684357	7.94	7.91	-12.2243	0.161487	0.567276	0.0716609
1970.42	1	3.98	0.516797	-0.323798	0.338651	7.6	7.84	-0.61985	0.184221	0.567276	0.0716609
1970.5	0	4	0.2574	0.245007	-0.0249141	7.21	7.46	0.171833	0.100625	3.66942	3.31123
1970.58	0	3.98	0.25674	-0.178409	0.419154	6.61	7.53	2.86403	0.0990077	3.66942	3.31123
1970.67	1	3.96	0.51151	-0.691629	0.495033	6.29	7.39	5.80849	0.236517	3.66942	3.31123
1970.75	0	3.95	0.508907	-2.02077	-0.608528	6.2	7.33	2.14444	0.141341	-4.30971	-3.77437
1970.83	0	3.95	0.50633	-0.607424	-0.662254	5.6	6.84	-0.10673	0.349505	-4.30971	-3.77437
1970.92	1	3.95	0.503779	2.27054	0.928056	4.9	6.39	6.62205	0.204192	-4.30971	-3.77437
1971	0	3.99	0.250941	0.766323	1.36042	4.14	6.24	3.74894	-0.120358	10.7191	7.89717
1971.08	0	3.97	0	-0.190901	0.188363	3.72	6.11	3.79899	-0.0817107	10.7191	7.89717
1971.17	1	3.98	0.250313	-0.108175	0.0522603	3.71	5.7	2.53178	0.102473	10.7191	7.89717
1971.25	0	3.99	0.249688	0.559843	0.597307	4.15	5.83	3.35668	-0.0597264	2.15861	2.60602
1971.33	0	4	0.497513	0.506149	-0.0727361	4.63	6.39	-1.36855	0.0307067	2.15861	2.60602
1971.42	1	3.99	0.495051	0.418479	0.804076	4.91	6.52	-1.86773	-0.0257158	2.15861	2.60602
1971.5	0	4	0.246609	-0.290674	-0.430567	5.31	6.73	-0.724641	0.0575239	3.27847	3.37462
1971.58	0	3.98	0.246003	-0.582089	0.571391	5.56	6.58	-1.79377	0.0934422	3.27847	3.37462
1971.67	1	3.97	0.245399	1.61215	0.990445	5.55	6.14	2.197	-0.112729	3.27847	3.37462
1971.75	0	3.99	0.244798	0.745799	0.244391	5.2	5.93	-2.14559	-0.113571	0.942007	5.02771
1971.83	0	4	0.2442	0.423651	0.507238	4.91	5.81	-4.74651	0.202199	0.942007	5.02771
1971.92	1	4.02	0.243605	1.14775	0.642181	4.14	5.93	6.66044	-0.0199539	0.942007	5.02771
1972	0	4.02	0.243013	2.37716	0.0134048	3.5	5.95	4.08018	-0.18173	7.289	5.75647
1972.08	0	4.04	0.484262	0.961512	0.24098	3.29	6.08	1.82259	-0.109705	7.289	5.75647
1972.17	1	4.04	0	0.688734	1.6116	3.83	6.07	2.34863	0.0889782	7.289	5.75647
1972.25	0	4.05	0.241255	1.05152	0.292335	4.17	6.19	1.01618	-0.0914107	8.97754	5.09779
1972.33	0	4.05	0.240674	-0.0518779	0.500565	4.27	6.13	-1.01618	-0.0554833	8.97754	5.09779
1972.42	1	4.06	0.240096	0.283349	0.322565	4.46	6.11	0.278164	-0.0116886	8.97754	5.09779
1972.5	0	4.05	0.239521	-0.0437572	0.732485	4.55	6.11	-0.743498	-0.0203709	3.75984	6.49659
1972.58	0	4.06	0.238949	1.32048	0.537835	4.8	6.21	3.4834	0.00561537	3.75984	6.49659
1972.67	1	4.06	0.476191	0.760865	0.170087	4.87	6.55	-1.45193	-0.0949122	3.75984	6.49659
1972.75	0	4.07	0.237248	1.3278	1.63784	5.04	6.48	0.182648	0.0234389	6.64239	10.1647
1972.83	0	4.07	0.472814	1.17586	0.39038	5.06	6.28	4.89639	-0.318097	6.64239	10.1647
1972.92	1	4.06	0.235571	1.13887	0.385732	5.33	6.36	2.0637	-0.0880584	6.64239	10.1647
1973	0	4.04	0.469484	0.648317	0.971819	5.94	6.46	0.763039	-0.221111	9.77874	7.07847
1973.08	0	4.09	0.70012	1.47143	0.608788	6.58	6.64	-3.61174	0.0935162	9.77874	7.07847
1973.17	1	4.09	0.925933	0.0469806	0.132391	7.09	6.71	-1.58874	-0.0926146	9.77874	7.07847
1973.25	0	4.08	0.688866	-0.138177	-0.391523	7.12	6.67	-1.886	0.063463	4.33107	2.18481
1973.33	0	4.07	0.456622	0.641397	0.209825	7.84	6.85	-2.85077	-0.143797	4.33107	2.18481
1973.42	1	4.07	0.681047	0.0685627	-0.249989	8.49	6.9	-2.26425	0.00694502	4.33107	2.18481
1973.5	0	4.07	0	0.412545	0.791029	10.4	7.13	0.949675	-0.0677743	-2.10916	1.28639
1973.58	0	4.06	1.79377	-0.166582	-1.24631	10.5	7.4	-1.90845	0.00509921	-2.10916	1.28639
1973.67	1	4.07	0.44346	0.892162	1.45457	10.78	7.09	1.71924	0.0324768	-2.10916	1.28639
1973.75	0	4.06	0.881063	0.671316	-0.687668	10.01	6.79	3.90022	-0.244297	3.77899	4.18523
1973.83	0	4.06	0.65574	0.527532	0.181586	10.03	6.73	-7.36877	0.248141	3.77899	4.18523
1973.92	1	4.06	0.867684	-0.238961	-0.852304	9.95	6.74	-7.34144	0.0930445	3.77899	4.18523
1974	0	4.05	1.07412	-0.705616	-0.0558382	9.65	6.99	1.3935	0.153224	-3.45393	-3.18428
1974.08	0	4.04	1.06271	-0.310935	-0.578828	8.97	6.96	-2.80668	0.0791785	-3.45393	-3.18428
1974.17	1	4.04	1.05153	0.0314364	0.152812	9.35	7.21	4.18103	-0.104256	-3.45393	-3.18428
1974.25	0	3.95	0.625654	-0.34613	0.335988	10.51	7.51	-5.24607	-0.00831295	0.94958	-1.57514
1974.33	0	4.03	1.03414	0.785204	0.291518	11.31	7.58	-3.06399	0.0779165	0.94958	-1.57514
1974.42	1	4.02	0.819677	-0.108629	-0.238734	11.93	7.54	0.133735	0.226443	0.94958	-1.57514
1974.5	0	4.01	0.610378	0.0492172	0.328499	12.92	7.81	-12.4109	0.127479	-3.79851	-2.17323
1974.58	0	4.02	1.20969	-0.975423	0.74595	12.01	8.04	-4.22362	-0.0354114	-3.79851	-2.17323
1974.67	1	4	1.39306	0.049245	-1.00928	11.34	8.04	-10.9857	0.423403	-3.79851	-2.17323
1974.75	0	4	0.787406	-0.373707	-0.276471	10.06	7.9	1.91922	0.0910487	-1.55559	-4.79275
1974.83	0	3.95	0.975617	-3.33331	-1.06013	9.45	7.68	3.25854	0.649155	-1.55559	-4.79275
1974.92	1	3.93	0.773698	-3.60473	-0.19511	8.53	7.43	-6.73116	0.533599	-1.55559	-4.79275
1975	0	3.92	0.767758	-1.38133	0.812541	7.13	7.5	7.8677	0.902102	-4.89908	-4.57389
1975.08	0	3.89	0.571975	-2.32676	0.867961	6.24	7.39	9.8862	0.0510389	-4.89908	-4.57389
1975.17	1	3.88	0.379507	-1.07804	-0.213957	5.54	7.73	4.49185	0.457757	-4.89908	-4.57389
1975.25	0	3.9	0.378072	0.0788266	0.111687	5.49	8.23	1.11574	0.226942	2.84801	3.30015
1975.33	0	3.9	0.188501	-0.229376	1.9802	5.22	8.06	6.15685	0.192117	2.84801	3.30015
1975.42	1	3.92	0.750473	0.656142	0.142773	5.55	7.86	2.52068	-0.197964	2.84801	3.30015
1975.5	0	3.94	0.930239	0.963419	0.405938	6.1	8.06	0.0973552	-0.140584	6.78869	8.0524
1975.58	0	3.97	0.369686	1.03211	0.256647	6.14	8.4	-7.6131	-0.224281	6.78869	8.0524
1975.67	1	3.98	0.735297	1.22842	0.252982	6.24	8.43	-1.22082	-0.00888284	6.78869	8.0524
1975.75	0	3.99	0.547947	0.441059	-0.00601594	5.82	8.14	4.50319	-0.0333806	5.35009	4.01326
1975.83	0	3.99	0.725956	0.215506	0.755173	5.22	8.05	1.67939	-0.107773	5.35009	4.01326
1975.92	1	4.02	0.541029	1.23682	0.947846	5.2	8	-1.53273	-0.0668882	5.35009	4.01326
1976	0	4.03	0.359067	1.43809	0.988738	4.87	7.74	8.80067	-0.266568	8.8954	8.21785
1976.08	0	4.04	0.179051	0.998194	-0.0849531	4.77	7.79	3.78856	-0.224298	8.8954	8.21785
1976.17	1	4.02	0.178731	0.0895005	0.496975	4.84	7.73	0.495787	-0.1184	8.8954	8.21785
1976.25	0	3.96	0.178412	0.561574	0.711912	4.82	7.56	0.788181	0.0623309	2.92407	2.50493
1976.33	0	4.03	0.533335	0.465507	-0.717745	5.29	7.9	-0.689318	-0.29707	2.92407	2.50493
1976.42	1	4.02	0.530505	0.0196996	1.13671	5.48	7.86	0.591135	0.277628	2.92407	2.50493
1976.5	0	4.03	0.527706	0.596892	0.287919	5.31	7.83	2.3302	0.118757	2.18888	3.03594
1976.58	0	4.02	0.524936	0.701987	0.175224	5.29	7.77	-0.867475	0.0162776	2.18888	3.03594
1976.67	1	4.02	0.522194	0.282296	0.375267	5.25	7.59	2.10736	-0.127795	2.18888	3.03594
1976.75	0	4	0.519482	0.0383343	0.154281	5.02	7.41	-3.4719	0.0397692	2.88893	1.25123
1976.83	0	4.01	0.344828	1.46373	0.575025	4.95	7.29	-0.689318	0.151914	2.88893	1.25123
1976.92	1	3.99	0.515023	1.04096	1.31967	4.65	6.87	3.40004	-0.0846089	2.88893	1.25123
1977	0	3.94	0.512384	-0.54902	-0.288949	4.61	7.21	-0.863315	-0.261449	4.69827	4.41517
1977.08	0	4.02	1.01696	1.51344	0.554717	4.68	7.39	-2.73455	0.122501	4.69827	4.41517
1977.17	1	4.03	0.504627	1.23192	0.0670297	4.69	7.46	-0.396826	-0.164214	4.69827	4.41517
1977.25	0	4.04	0.668899	0.936368	0.139501	4.73	7.37	-1.55275	-0.268496	7.70181	9.27319
1977.33	0	4.05	0.332779	0.830768	0.27564	5.35	7.46	-0.293211	-0.174377	7.70181	9.27319
1977.42	1	4.05	0.497101	0.719403	-0.0361518	5.39	7.28	0.53522	0.194787	7.70181	9.27319
1977.5	0	4.04	0.494642	0.140145	0.808891	5.42	7.33	0.912333	-0.295251	7.15306	7.2915
1977.58	0	4.04	0.492208	0.0281269	-0.0579558	5.9	7.4	-2.4755	0.0651376	7.15306	7.2915
1977.67	1	4.04	0.326798	0.480373	0.311462	6.14	7.34	-1.5672	-0.181054	7.15306	7.2915
1977.75	0	4.06	0.488203	0.191706	0.830403	6.47	7.52	-2.62162	-0.0125963	0.0087486	2.30055
1977.83	0	4.05	0.647251	0.105453	0.609493	6.51	7.58	0.574409	0.000435671	0.0087486	2.30055
1977.92	1	4.04	0.482704	0.16689	0.197829	6.56	7.69	-0.489103	-0.421172	0.0087486	2.30055
1978	0	3.95	0.640002	-1.3891	-1.07515	6.7	7.96	-3.87945	0.0780434	1.27468	2.38561
1978.08	0	3.99	0.477328	0.493834	1.44806	6.78	8.03	-1.4172	-0.167284	1.27468	2.38561
1978.17	1	4.05	0.632914	1.88822	0.99303	6.79	8.04	-0.179978	0.00299018	1.27468	2.38561
1978.25	0	4.04	0.78555	2.05056	0.601738	6.89	8.15	4.28645	-0.184313	15.1658	11.8725
1978.33	0	4.04	0.934586	0.370254	0.397394	7.36	8.35	4.94525	-0.0712405	15.1658	11.8725
1978.42	1	4.06	0.772205	0.68661	0.324688	7.6	8.46	0.256318	-0.124607	15.1658	11.8725
1978.5	0	4.06	0.766287	-0.0463718	-0.475512	7.81	8.64	-0.482423	0.272807	4.002	2.89621
1978.58	0	4.05	0.60883	0.374784	0.898924	8.04	8.41	6.67611	-0.230122	4.002	2.89621
1978.67	1	4.05	0.906351	0.252202	-0.160212	8.45	8.42	0	0.0273902	4.002	2.89621
1978.75	0	4.05	0.89821	0.798927	0.168085	8.96	8.64	-3.22766	-0.189156	5.34077	3.85504
1978.83	0	4.06	0.594355	0.754752	0.361475	9.76	8.81	-6.03327	0.0986771	5.34077	3.85504
1978.92	1	4.05	0.590844	0.53318	0.602168	10.03	9.01	1.46738	0.131497	5.34077	3.85504
1979	0	4.04	0.879771	-0.645097	-0.359301	10.07	9.1	3.67726	-0.128659	0.718489	3.14685
1979.08	0	4.05	1.01671	0.535838	0.483973	10.06	9.1	-1.49543	0.0362432	0.718489	3.14685
1979.17	1	4.06	1.00648	0.312654	0.0959954	10.09	9.12	1.8858	-0.0661056	0.718489	3.14685
1979.25	0	3.93	0.99645	-1.13451	-0.564319	10.01	9.18	1.9783	-0.0150167	0.427488	-1.99099
1979.33	0	4.02	1.12677	0.800098	0.283858	10.24	9.25	-2.34862	-0.219775	0.427488	-1.99099
1979.42	1	4.02	1.11422	-0.0056267	0.254526	10.29	8.91	1.95608	0.0887051	0.427488	-1.99099
1979.5	0	4.02	1.10194	-0.135887	-0.0960204	10.47	8.95	0.978481	0.0154956	2.96051	0.486468
1979.58	0	4.01	0.954336	-0.665958	1.07431	10.94	9.03	4.47481	0.303182	2.96051	0.486468
1979.67	1	4.01	0.945314	0.110924	0.248849	11.43	9.33	1.11112	-0.147919	2.96051	0.486468
1979.75	0	4.02	1.06953	0.546958	-0.343934	13.77	10.3	-3.84843	0.09085	0.999045	1.56324
1979.83	0	4.01	1.05821	-0.0886961	0.254215	13.18	10.65	-0.768496	-0.061119	0.999045	1.56324
1979.92	1	4.01	1.17725	0.128696	-0.300505	13.78	10.39	3.87755	0.0571314	0.999045	1.56324
1980	0	4	1.4203	0.45596	0.8019	13.82	10.8	2.83512	0.318973	1.25609	-0.339191
1980.08	0	4.01	1.2739	0.0029904	-0.837919	14.13	12.41	3.89085	0.00987237	1.25609	-0.339191
1980.17	1	3.99	1.3828	-0.329294	-0.819052	17.19	12.75	-9.64383	0.0404139	1.25609	-0.339191
1980.25	0	3.98	0.993797	-2.07618	-1.27939	17.61	11.47	-1.63701	0.581269	-8.328	-6.52353
1980.33	0	3.93	0.984018	-2.46104	-0.489965	10.98	10.18	4.46206	0.563615	-8.328	-6.52353
1980.42	1	3.92	0.974429	-1.24189	0.46894	9.47	9.78	6.20982	0.11718	-8.328	-6.52353
1980.5	0	3.91	0.121139	-0.775026	0.855791	9.03	10.25	4.43759	0.220474	-0.475677	2.99123
1980.58	0	3.95	0.723767	0.358543	0.119801	9.61	11.1	3.04175	-0.0726256	-0.475677	2.99123
1980.67	1	3.96	0.837827	1.60891	0.018218	10.87	11.51	2.40012	-0.242263	-0.475677	2.99123
1980.75	0	3.98	0.948999	1.25382	1.23881	12.81	11.75	2.88294	0.0409735	7.39099	9.19925
1980.83	0	3.99	1.05697	1.71148	-0.277978	15.85	12.68	4.13748	-0.0718378	7.39099	9.19925
1980.92	1	4.01	0.930239	0.564045	0.706299	18.9	12.84	-1.63451	-0.269105	7.39099	9.19925
1981	0	4.01	0.921666	-0.573383	0.0281485	19.08	12.57	-0.375235	0.281917	7.76195	2.86585
1981.08	0	3.98	0.913248	-0.460013	-0.251057	15.93	13.19	-3.51987	-0.0333864	7.76195	2.86585
1981.17	1	4	0.679504	0.528033	0.291986	14.7	13.12	3.67014	-0.0848729	7.76195	2.86585
1981.25	0	4.01	0.562748	-0.445541	-0.361266	15.72	13.68	0.896867	-0.128853	-2.97535	0.166257
1981.33	0	4.02	0.671143	0.593615	0.0461917	18.52	14.1	-2.02938	0.259603	-2.97535	0.166257
1981.42	1	4	0.887908	0.47074	0.675039	19.1	13.47	0.454546	-0.0130849	-2.97535	0.166257
1981.5	0	3.99	1.09891	0.654132	-0.20663	19.04	14.28	-2.44848	-0.227489	4.76164	5.69896
1981.58	0	4	0.762116	-0.0135411	0.63384	17.82	14.94	0.386549	0.147858	4.76164	5.69896
1981.67	1	3.96	0.971405	-0.597063	-0.659379	15.87	15.32	-9.1229	0.208558	4.76164	5.69896
1981.75	0	3.96	0.321716	-0.676818	-0.535274	15.08	15.15	1.25999	0.330682	-4.3821	-4.12211
1981.83	0	3.94	0.427351	-1.15128	-0.190212	13.31	13.39	2.55473	0.335226	-4.3821	-4.12211
1981.92	1	3.92	0.319319	-1.09785	0.613035	12.37	13.72	0.729634	0.243114	-4.3821	-4.12211
1982	0	3.73	0.318303	-2.01342	-0.176599	13.22	14.59	-5.39326	0.105363	-6.26294	-3.17656
1982.08	0	3.96	0.317293	1.96314	0.902745	14.78	14.43	-2.41599	0.251618	-6.26294	-3.17656
1982.17	1	3.91	0	-0.765472	-0.111763	14.68	13.86	-3.2848	0.165318	-6.26294	-3.17656
1982.25	0	3.91	0.316289	-0.883278	0.0584372	14.94	13.87	4.84463	0.296987	1.82064	1.44683
1982.33	0	3.91	0.942909	-0.645525	0.301805	14.45	13.62	0.0859476	0.0290992	1.82064	1.44683
1982.42	1	3.92	1.1405	-0.337239	-0.543397	14.15	14.3	-5.92832	0.21586	1.82064	1.44683
1982.5	0	3.92	0.51414	-0.311476	0.581375	12.59	13.95	-0.273848	0.259207	-1.53211	-1.55736
1982.58	0	3.9	0.204918	-0.880125	0.0733834	10.12	13.06	0.273848	0.0136532	-1.53211	-1.55736
1982.67	1	3.9	0	-0.306887	0.896483	10.31	12.34	10.9545	0.285058	-1.53211	-1.55736
1982.75	0	3.89	0.408581	-0.894986	0.437758	9.71	10.91	8.07966	0.279627	0.159738	-1.75758
1982.83	0	3.9	-0.101989	-0.401317	0.802978	9.2	10.55	3.98871	0.339616	0.159738	-1.75758
1982.92	1	3.9	-0.306592	-0.722061	0.42251	8.95	10.54	0.936944	0.0985321	0.159738	-1.75758
1983	0	3.93	0.204499	1.91715	0.103502	8.68	10.46	3.4547	-0.429023	5.23698	4.27758
1983.08	0	3.93	0.102093	-0.627061	-0.0270973	8.51	10.72	1.71767	0.0156877	5.23698	4.27758
1983.17	1	3.96	0.101989	0.808285	1.04651	8.77	10.51	3.41513	-0.119449	5.23698	4.27758
1983.25	0	3.97	0.711024	1.21475	0.612515	8.8	10.4	3.74721	-0.148754	9.0004	6.66695
1983.33	0	4	0.404041	0.681286	0.591925	8.63	10.38	3.97815	-0.0999553	9.0004	6.66695
1983.42	1	4.01	0.20141	0.596722	0.958941	8.98	10.85	1.39185	-0.0152193	9.0004	6.66695
1983.5	0	4.03	0.401607	1.50206	0.675309	9.37	11.38	0.359928	-0.613512	7.9174	5.50767
1983.58	0	4.03	0.30015	1.10961	0.26507	9.56	11.85	-2.79314	0.0268798	7.9174	5.50767
1983.67	1	4.06	0.299252	1.50258	0.271441	9.45	11.65	2.91283	-0.309304	7.9174	5.50767
1983.75	0	4.06	0.397615	0.828023	0.7959	9.48	11.54	0.298597	-0.322481	8.25902	9.2115
1983.83	0	4.06	0.297177	0.348943	0.224242	9.34	11.69	-1.50198	-0.369495	8.25902	9.2115
1983.92	1	4.05	0.296297	0.526092	1.09296	9.47	11.83	-0.485438	-0.157023	8.25902	9.2115
1984	0	4.06	0.687963	1.9726	0.632659	9.56	11.67	1.2092	-0.27912	7.74364	10.7659
1984.08	0	4.11	0.488521	0.428014	-1.32975	9.59	11.84	-5.62397	-0.221634	7.74364	10.7659
1984.17	1	4.07	0.291971	0.491541	0.83086	9.91	12.32	0.0635526	-0.0467117	7.74364	10.7659
1984.25	0	4.08	0.387973	0.626288	0.682189	10.29	12.63	0.126984	-0.0122674	6.85214	6.47392
1984.33	0	4.07	0.193424	0.47263	0.561543	10.32	13.41	-0.636539	-0.306811	6.85214	6.47392
1984.42	1	4.06	0.19305	0.348317	0.673785	11.06	13.56	-2.26035	-0.213061	6.85214	6.47392
1984.5	0	4.06	0.384986	0.313771	-0.401002	11.23	13.36	-1.31494	0.263045	3.83779	4.19772
1984.58	0	4.05	0.28777	0.0951687	0.39648	11.64	12.72	8.43606	0.00327428	3.83779	4.19772
1984.67	1	4.05	0.286944	-0.177222	0.718706	11.3	12.52	1.02875	-0.145019	3.83779	4.19772
1984.75	0	4.05	0.381316	-0.164845	-0.330549	9.99	12.16	-0.78574	0.00183752	3.27005	4.37009
1984.83	0	4.04	0.190114	0.39389	1.43122	9.43	11.57	0.906077	-0.170009	3.27005	4.37009
1984.92	1	4.05	0.189753	0.111925	0.153087	8.38	11.5	-1.08828	0.113883	3.27005	4.37009
1985	0	4.03	0.189394	-0.15983	0.891661	8.35	11.38	4.22556	0.0475015	3.85769	3.38623
1985.08	0	4.01	0.566039	0.342307	0.37284	8.5	11.51	5.27782	-0.098442	3.85769	3.38623
1985.17	1	4.04	0.469264	0.161234	-0.0985578	8.58	11.86	-0.832644	-0.0127813	3.85769	3.38623
1985.25	0	4.05	0.187091	-0.273133	0.269161	8.27	11.43	0.666669	0.0483678	3.50641	2.83832
1985.33	0	4.04	0.186741	0.141185	1.1451	7.97	10.85	2.35305	-0.0745781	3.50641	2.83832
1985.42	1	4.05	0.27946	0.0732666	-0.532896	7.53	10.16	2.14026	0.15429	3.50641	2.83832
1985.5	0	4.04	0.185874	-0.652415	0.729306	7.88	10.31	1.88784	0.0233059	6.06232	4.82028
1985.58	0	4.06	0.185529	0.413435	1.00193	7.9	10.33	-2.20597	-0.2731	6.06232	4.82028
1985.67	1	4.06	0.185185	0.430674	1.36331	7.92	10.37	-2.25573	0.00720499	6.06232	4.82028
1985.75	0	4.07	0.369345	-0.414143	-1.56631	7.99	10.24	1.13423	0.0283449	2.96217	2.23278
1985.83	0	4.07	0.459771	0.337297	0.262762	8.05	9.78	5.89172	-0.145766	2.96217	2.23278
1985.92	1	4.09	0.457667	1.04124	1.10119	8.27	9.26	4.84284	-0.0045785	2.96217	2.23278
1986	0	4.07	0.364631	0.462765	0.101234	8.14	9.19	0.433214	-0.313622	3.71669	3.93315
1986.08	0	4.07	-0.182149	-0.658238	-0.246937	7.86	8.7	5.23974	0.507896	3.71669	3.93315
1986.17	1	4.07	-0.548447	-0.6916	0.339645	7.48	7.78	5.71331	-0.0369365	3.71669	3.93315
1986.25	0	4.05	-0.36731	0.0316529	0.615167	6.99	7.3	2.4241	-0.0220477	1.79749	1.11631
1986.33	0	4.07	0.275609	0.216174	0.598923	6.85	7.71	0.209864	0.0509543	1.79749	1.11631
1986.42	1	4.07	0.366301	-0.326383	-0.222873	6.92	7.8	2.81126	0.0246239	1.79749	1.11631
1986.5	0	4.06	0.0913659	0.558461	0.654704	6.56	7.3	-2.101	-0.162739	3.80993	2.50186
1986.58	0	4.07	0.0912825	-0.133683	0.477407	6.17	7.17	1.97863	-0.156986	3.80993	2.50186
1986.67	1	4.07	0.364299	0.202656	2.16799	5.89	7.45	-2.77278	0.133562	3.80993	2.50186
1986.75	0	4.06	0.181653	0.466605	-1.4981	5.85	7.43	-0.37839	-0.0636984	2.14255	3.14699
1986.83	0	4.07	0.181324	0.454331	-0.332328	6.04	7.25	3.19198	-0.077724	2.14255	3.14699
1986.92	1	4.08	0.361664	0.838418	2.18489	6.91	7.11	1.41789	-0.23136	2.14255	3.14699
1987	0	4.08	0.540055	-0.306888	-2.53895	6.43	7.08	6.19961	-0.00551295	2.96964	4.11838
1987.08	0	4.12	0.358423	1.30017	1.88139	6.1	7.25	6.01575	-0.0381075	2.96964	4.11838
1987.17	1	4.1	0.357143	0.130135	0.119326	6.13	7.25	4.04659	-0.0107082	2.96964	4.11838
1987.25	0	4.08	0.444643	0.628787	0.471861	6.37	8.02	-1.10005	-0.271796	4.29248	6.33126
1987.33	0	4.1	0.26584	0.643589	0.0623448	6.85	8.61	-0.0691563	-0.00872459	4.29248	6.33126
1987.42	1	4.09	0.441502	0.46395	0.417311	6.73	8.4	4.16656	-0.127902	4.29248	6.33126
1987.5	0	4.1	0.263968	0.690746	0.483344	6.58	8.45	2.84565	-0.121727	3.45548	5.77942
1987.58	0	4.09	0.438405	0.827377	0.764173	6.73	8.76	6.0378	-0.026776	3.45548	5.77942
1987.67	1	4.08	0.349345	0.256405	-0.471708	7.22	9.42	-3.30226	-0.11705	3.45548	5.77942
1987.75	0	4.11	0.26121	1.44821	-0.0616051	7.29	9.52	-12.8747	0.0792716	6.80991	5.31397
1987.83	0	4.1	0.347223	0.52342	0.117216	6.69	8.86	-13.4245	-0.160826	6.80991	5.31397
1987.92	1	4.1	0.17316	0.492688	0.761528	6.77	8.99	-1.64613	-0.0911384	6.80991	5.31397
1988	0	4.11	0.345423	0.0449037	0.855461	6.83	8.67	3.8662	0.00265503	2.06119	4.74616
1988.08	0	4.11	0.172265	0.433513	0.0917816	6.58	8.21	2.98882	-0.0286806	2.06119	4.74616
1988.17	1	4.09	0.257843	0.199906	0.862912	6.58	8.37	2.90207	-0.0323395	2.06119	4.74616
1988.25	0	4.1	0.59906	0.564585	-0.409149	6.87	8.72	-1.17359	-0.242655	5.22124	4.57863
1988.33	0	4.1	0.255646	-0.117087	0.644957	7.09	9.09	-2.5064	0.155115	5.22124	4.57863
1988.42	1	4.11	0.424629	0.254363	0.327661	7.51	8.92	5.54432	-0.210342	5.22124	4.57863
1988.5	0	4.11	0.422834	0.04286	0.240244	7.75	9.06	-0.592814	0.0399896	2.33688	3.60288
1988.58	0	4.09	0.421053	0.41653	0.455835	8.01	9.26	-2.0271	0.174434	2.33688	3.60288
1988.67	1	4.1	0.419288	-0.274271	-0.277467	8.19	8.98	1.61749	-0.188385	2.33688	3.60288
1988.75	0	4.11	0.334169	0.495135	0.814898	8.3	8.8	3.44735	-0.0403586	5.29478	5.41305
1988.83	0	4.11	0.333056	0.158519	0.250574	8.35	8.96	-2.33417	-0.0441663	5.29478	5.41305
1988.92	1	4.09	0.331951	0.487687	0.544538	8.76	9.11	2.0092	-0.0148427	5.29478	5.41305
1989	0	4.11	0.413395	0.300379	0.178973	9.12	9.09	3.16809	0.0998272	4.04588	2.44362
1989.08	0	4.12	0.32949	-0.455772	-0.211034	9.36	9.17	2.96881	-0.251099	4.04588	2.44362
1989.17	1	4.11	0.492208	0.227128	-0.0641522	9.85	9.36	-0.443157	-0.128828	4.04588	2.44362
1989.25	0	4.11	0.733799	0.0677719	0.590905	9.84	9.18	3.22717	0.19907	3.04148	-0.701861
1989.33	0	4.1	0.486225	-0.665618	-0.116399	9.81	8.86	3.76546	-0.0714617	3.04148	-0.701861
1989.42	1	4.09	0.322841	0.0477139	0.195173	9.53	8.28	3.07427	0.141216	3.04148	-0.701861
1989.5	0	4.09	0.321802	-0.922555	0.295786	9.24	8.02	2.50166	-0.0649486	2.9526	1.65254
1989.58	0	4.09	0	0.919563	0.958084	8.99	8.11	4.33377	0.00448899	2.9526	1.65254
1989.67	1	4.08	0.240674	-0.349178	-0.189029	9.02	8.19	0.201758	0.0731308	2.9526	1.65254
1989.75	0	4.08	0.479617	-0.0651128	-0.0668015	8.84	8.01	0.0287894	0.0207742	0.787412	0.443914
1989.83	0	4.07	0.397931	0.327347	0.04825	8.55	7.87	-2.09432	0.0579775	0.787412	0.443914
1989.92	1	4.05	0.317209	0.60499	0.825909	8.45	7.84	2.43915	-0.0405199	0.787412	0.443914
1990	0	4.05	0.945634	-0.666148	0.497418	8.23	8.21	-2.50678	0.0106929	4.34745	3.80565
1990.08	0	4.06	0.39139	0.97563	-0.506618	8.24	8.47	-2.8402	-0.0750935	4.34745	3.80565
1990.17	1	4.06	0.467655	0.488153	0.336197	8.28	8.59	2.39506	-0.0459572	4.34745	3.80565
1990.25	0	4.05	0.23301	-0.152078	0.192391	8.26	8.79	-0.0827619	0.164722	1.44901	2.21495
1990.33	0	4.06	0.155039	0.213124	-0.073248	8.18	8.76	3.50689	-0.0541724	1.44901	2.21495
1990.42	1	4.07	0.617763	0.320617	0.316413	8.29	8.48	2.85396	-0.107398	1.44901	2.21495
1990.5	0	4.06	0.46083	-0.129487	0.204313	8.15	8.47	-0.0999417	0.257417	0.266003	-0.292852
1990.58	0	4.05	0.839379	0.328194	0.0309753	8.13	8.75	-8.48246	0.199854	0.266003	-0.292852
1990.67	1	4.05	0.681563	0.126441	-0.0473778	8.2	8.89	-4.74894	0.147421	0.266003	-0.292852
1990.75	0	4.04	0.676949	-0.754368	-0.559294	8.11	8.72	-2.66348	0.0674406	-3.65819	-1.86692
1990.83	0	4.02	0.224635	-1.17606	-0.0916859	7.81	8.39	2.62543	0.238407	-3.65819	-1.86692
1990.92	1	4.03	0.373274	-0.656334	-0.365745	7.31	8.08	4.18047	0.105093	-3.65819	-1.86692
1991	0	4.02	0.371886	-0.435085	-0.906323	6.91	8.09	-0.996584	0.0998078	-1.87577	-0.831287
1991.08	0	4.01	0.0742115	-0.700546	0.616823	6.25	7.85	10.703	0.195099	-1.87577	-0.831287
1991.17	1	4	0	-0.525349	1.16943	6.12	8.11	2.72841	0.242956	-1.87577	-0.831287
1991.25	0	4.01	0.222305	0.197008	-0.33273	5.91	8.04	1.96825	-0.132823	3.10678	1.16894
1991.33	0	4.02	0.369413	0.996123	0.254218	5.78	8.07	-0.446105	0.255046	3.10678	1.16894
1991.42	1	4.05	0.294551	0.906723	0.0164379	5.9	8.28	0.0793357	-0.043324	3.10678	1.16894
1991.5	0	4.05	0.146951	0.119102	0.48825	5.82	8.27	0.511524	-0.0743708	2.0161	1.11178
1991.58	0	4.06	0.293255	0.0854581	-0.152777	5.66	7.9	2.38308	0.0636324	2.0161	1.11178
1991.67	1	4.06	0.292398	0.886301	0.0473132	5.45	7.65	-0.566574	0.0170959	2.0161	1.11178
1991.75	0	4.06	0.145879	-0.174321	-0.402877	5.21	7.53	-0.0826788	0.0951903	1.39157	1.39137
1991.83	0	4.07	0.436364	-0.114559	0.471987	4.81	7.42	-0.248447	0.0669929	1.39157	1.39137
1991.92	1	4.07	0.289855	-0.39846	0.170751	4.43	7.09	0.668882	0.212853	1.39157	1.39137
1992	0	4.06	0.0723327	-0.560966	1.44867	4.03	7.03	6.85586	0.032726	4.75977	6.79748
1992.08	0	4.07	0.216685	0.713769	0.112634	4.06	7.34	-0.84959	0.137523	4.75977	6.79748
1992.17	1	4.07	0.360101	0.82756	0.182091	3.98	7.54	-1.26843	-0.0184202	4.75977	6.79748
1992.25	0	4.09	0.21544	0.755212	0.0837932	3.73	7.48	0.0122734	-0.0489437	4.31407	3.31983
1992.33	0	4.09	0.214977	0.325659	0.515474	3.82	7.39	1.80005	0.240812	4.31407	3.31983
1992.42	1	4.08	0.285919	0.0143022	0.269122	3.76	7.26	-1.58919	0.210294	4.31407	3.31983
1992.5	0	4.08	0.285104	0.899684	0.333625	3.25	6.84	1.64703	-0.15411	3.93368	1.26594
1992.58	0	4.08	0.213295	-0.493311	0.248172	3.3	6.59	0.691496	-0.0519627	3.93368	1.26594
1992.67	1	4.07	0.212842	0.232063	0.648318	3.22	6.42	0.131514	0.00196326	3.93368	1.26594
1992.75	0	4.08	0.424329	0.747285	0.336516	3.1	6.59	-1.43929	-0.270917	4.15105	3.74948
1992.83	0	4.09	0.281889	0.424504	0.170441	3.09	6.87	2.47577	0.106303	4.15105	3.74948
1992.92	1	4.09	0.140647	0.0902678	0.658159	2.92	6.77	2.98224	-0.012769	4.15105	3.74948
1993	0	4.11	0.350754	0.432245	-0.145115	3.02	6.6	-0.0941587	-0.171769	0.669041	-1.3888
1993.08	0	4.11	0.209864	0.442351	0.184813	3.03	6.26	1.47563	-0.113821	0.669041	-1.3888
1993.17	1	4.08	0.139665	-0.140093	-0.269561	3.07	5.98	1.89722	-0.10654	0.669041	-1.3888
1993.25	0	4.14	0.348311	0.350165	0.669106	2.96	5.97	-1.58527	0.0427626	2.32292	4.79223
1993.33	0	4.1	0.277778	-0.347768	0.348298	3	6.04	0.488558	-0.00709948	2.32292	4.79223
1993.42	1	4.09	0.0693241	0.165662	0.362449	3.04	5.96	0.629123	-0.0296762	2.32292	4.79223
1993.5	0	4.11	0.138504	0.308146	0.491987	3.06	5.81	-0.172	-0.146845	1.90472	0.800927
1993.58	0	4.11	0.207397	-0.105147	0.100143	3.03	5.68	1.51763	-0.140659	1.90472	0.800927
1993.67	1	4.13	0.138026	0.477118	0.571778	3.09	5.36	1.11894	-0.0195488	1.90472	0.800927
1993.75	0	4.13	0.412939	0.764876	0.155068	2.99	5.33	1.00961	0.0119159	5.40379	7.69265
1993.83	0	4.13	0.274349	0.413431	0.280868	3.02	5.72	-0.217957	-0.167541	5.40379	7.69265
1993.92	1	4.14	0.205269	0.545677	0.352072	2.96	5.77	0.658889	-0.0616791	5.40379	7.69265
1994	0	4.14	0	0.377941	0.272423	3.05	5.75	1.49959	0.0844356	3.86216	2.20802
1994.08	0	4.09	0.273038	0.0273358	0.797943	3.25	5.97	-0.298549	-0.0396605	3.86216	2.20802
1994.17	1	4.17	0.272294	1.00247	0.0132453	3.34	6.48	-1.66138	-0.0731064	3.86216	2.20802
1994.25	0	4.18	0.0679579	0.565066	0.421276	3.56	6.97	-3.6402	-0.117404	5.38379	6.16321
1994.33	0	4.18	0.203597	0.510785	-0.178206	4.01	7.18	0.817258	-0.325799	5.38379	6.16321
1994.42	1	4.18	0.270819	0.636178	0.596073	4.25	7.1	0.867814	0.0192966	5.38379	6.16321
1994.5	0	4.18	0.337496	0.153117	-0.0673329	4.26	7.3	-0.756986	0.0103136	2.33125	3.69822
1994.58	0	4.17	0.403498	0.592579	0.65661	4.47	7.24	2.80478	-0.0387657	2.33125	3.69822
1994.67	1	4.16	0.20114	0.380427	0.150038	4.73	7.46	0.584194	-0.158135	2.33125	3.69822
1994.75	0	4.18	0.0669568	0.843284	0.620585	4.76	7.74	-0.676862	-0.091851	4.55605	4.75532
1994.83	0	4.18	0.26738	0.614489	0.0728527	5.29	7.96	-0.605525	-0.201315	4.55605	4.75532
1994.92	1	4.18	0.200067	1.04463	0.265059	5.45	7.81	-1.27048	-0.112432	4.55605	4.75532
1995	0	4.18	0.266135	0.182674	-0.00484234	5.53	7.78	2.186	0.106207	1.41651	1.6709
1995.08	0	4.17	0.265428	-0.162754	-0.184183	5.92	7.47	3.52032	-0.145556	1.41651	1.6709
1995.17	1	4.15	0.19861	0.143957	0.525799	5.98	7.2	2.30353	-0.0254483	1.41651	1.6709
1995.25	0	4.1	0.39604	-0.0639098	-0.164217	6.05	7.06	2.94909	0.351386	1.19159	2.3227
1995.33	0	4.11	0.197433	0.339113	0.719266	6.01	6.63	3.08248	-0.130746	1.19159	2.3227
1995.42	1	4.12	0.197044	0.33878	0.798277	6	6.17	2.92357	-0.00645889	1.19159	2.3227
1995.5	0	4.11	0.131148	-0.398572	-0.27175	5.85	6.28	3.28646	0.058804	3.38832	4.90017
1995.58	0	4.12	0.196399	1.25436	0.488936	5.74	6.49	0.311694	-0.0321922	3.38832	4.90017
1995.67	1	4.12	0.130719	0.400165	0.234096	5.8	6.2	3.45589	-0.0162521	3.38832	4.90017
1995.75	0	4.12	0.260926	-0.123081	-0.390993	5.76	6.04	0.714479	-0.117485	2.7069	2.60046
1995.83	0	4.13	0.130208	0.251351	0.830811	5.8	5.93	2.14018	0.0781456	2.7069	2.60046
1995.92	1	4.09	0.130039	0.380902	0.635022	5.6	5.71	3.14711	0.00208866	2.7069	2.60046
1996	0	3.97	0.518472	-0.655816	-0.452727	5.56	5.65	-0.0244103	0.0468406	2.98462	4.43517
1996.08	0	4.13	0.193736	1.52848	0.764837	5.22	5.81	5.55857	-0.148158	2.98462	4.43517
1996.17	1	4.11	0.322061	-0.0940649	0.483404	5.31	6.27	-0.380994	-0.00566233	2.98462	4.43517
1996.25	0	4.12	0.38511	0.910666	0.368364	5.22	6.51	0.0154531	0.0632767	6.61637	5.77616
1996.33	0	4.14	0.192	0.729646	0.129688	5.24	6.74	2.14927	-0.00474305	6.61637	5.77616
1996.42	1	4.15	0.191632	0.841468	0.117192	5.27	6.91	1.09347	-0.246577	6.61637	5.77616
1996.5	0	4.14	0.191266	-0.12974	0.210907	5.4	6.87	-3.7229	0.157017	3.57197	3.67324
1996.58	0	4.15	0.127307	0.578217	0.343886	5.22	6.64	2.84848	-0.330041	3.57197	3.67324
1996.67	1	4.16	0.317561	0.686217	0.127122	5.3	6.83	1.82427	0.0545169	3.57197	3.67324
1996.75	0	4.14	0.316556	-0.0594678	0.2965	5.24	6.53	3.8629	0.0229287	4.13211	4.91409
1996.83	0	4.15	0.315557	0.878982	0.248444	5.31	6.2	4.76178	0.148524	4.13211	4.91409
1996.92	1	4.17	0.251731	0.647774	0.395017	5.29	6.3	1.02508	0.00837721	4.13211	4.91409
1997	0	4.14	0.188383	0.141656	0.47197	5.25	6.58	3.04369	-0.0837265	2.57396	4.39424
1997.08	0	4.16	0.188029	1.20248	0.21106	5.19	6.42	4.11279	-0.0391734	2.57396	4.39424
1997.17	1	4.18	0.0625978	0.667381	0.267706	5.39	6.69	-0.783381	-0.0940121	2.57396	4.39424
1997.25	0	4.18	0.0625587	0.0234807	-0.00450596	5.51	6.89	-3.62872	-0.0981054	6.59337	5.14029
1997.33	0	4.17	0	0.583643	0.0615639	5.5	6.71	8.66655	-0.163978	6.59337	5.14029
1997.42	1	4.16	0.187441	0.486659	0.492645	5.56	6.49	5.05554	0.102416	6.59337	5.14029
1997.5	0	4.16	0.124766	0.759858	0.929243	5.52	6.22	5.44101	-0.115241	4.97236	6.34366
1997.58	0	4.17	0.249066	1.03941	0.606398	5.54	6.3	0.210523	-0.0394352	4.97236	6.34366
1997.67	1	4.17	0.248447	0.884381	0.0205913	5.54	6.21	1.04922	0.0331026	4.97236	6.34366
1997.75	0	4.18	0.185931	0.856675	0.509019	5.5	6.03	1.49777	-0.146344	3.4206	5.38182
1997.83	0	4.18	0.123762	0.87407	0.410312	5.52	5.88	-1.2952	-0.117912	3.4206	5.38182
1997.92	1	4.2	0.0618238	0.307881	0.568146	5.5	5.81	2.46687	0.115975	3.4206	5.38182
1998	0	4.19	0.123533	0.512231	-0.0884244	5.56	5.54	0.102818	-0.076711	3.97807	4.15365
1998.08	0	4.17	0	0.131251	0.646157	5.51	5.57	6.07907	-0.0457944	3.97807	4.15365
1998.17	1	4.16	0	0.0675189	0.444244	5.49	5.65	5.0559	0.0803703	3.97807	4.15365
1998.25	0	4.12	0.123381	0.369394	0.532213	5.45	5.64	3.23185	-0.347777	3.68619	5.59909
1998.33	0	4.15	0.246306	0.633852	0.720824	5.49	5.65	-0.340446	0.0701624	3.68619	5.59909
1998.42	1	4.14	0.122926	-0.629377	0.662203	5.56	5.5	-0.00270659	0.117381	3.68619	5.59909
1998.5	0	4.14	0.245399	-0.347957	0.0633076	5.54	5.46	4.25589	0.0297914	4.97915	5.44067
1998.58	0	4.14	0.122474	2.03168	0.456036	5.55	5.34	-7.35003	-0.057557	4.97915	5.44067
1998.67	1	4.13	0.0611808	-0.195622	0.740646	5.51	4.81	-5.15372	0.0642441	4.97915	5.44067
1998.75	0	4.14	0.24435	0.806449	0.337119	5.07	4.53	1.15241	-0.0142329	6.41186	3.81974
1998.83	0	4.14	0.121951	-0.0649549	0.271089	4.83	4.83	10.2953	-0.133423	6.41186	3.81974
1998.92	1	4.15	0.182648	0.370652	0.812996	4.68	4.65	3.90886	-0.0570946	6.41186	3.81974
1999	0	4.13	0.182315	0.467039	-0.143959	4.63	4.72	4.81637	-0.0518372	3.76808	5.25192
1999.08	0	4.14	0	0.531861	0.500904	4.76	5	-0.175527	0.0982591	3.76808	5.25192
1999.17	1	4.13	0.060698	0.1585	0.430466	4.81	5.23	2.77523	-0.228918	3.76808	5.25192
1999.25	0	4.13	0.665258	0.270958	0.566581	4.74	5.18	4.05954	0.15217	3.06486	2.40337
1999.33	0	4.14	0.0602591	0.686077	0.424858	4.74	5.54	-0.201738	-0.154122	3.06486	2.40337
1999.42	1	4.13	0	-0.167186	0.432442	4.76	5.9	-0.717243	0.104609	3.06486	2.40337
1999.5	0	4.14	0.4208	0.630905	0.175398	4.99	5.79	4.32389	0.0497004	5.20465	3.83552
1999.58	0	4.15	0.239665	0.42003	0.537661	5.07	5.94	-3.95107	-0.133839	5.20465	3.83552
1999.67	1	4.14	0.418036	-0.422863	0.473887	5.22	5.92	-0.704553	0.0493911	5.20465	3.83552
1999.75	0	4.14	0.178625	1.32479	0.206374	5.2	6.11	-1.38725	-0.102534	6.74121	6.30972
1999.83	0	4.14	0.178306	0.471157	0.470682	5.42	6.03	6.7651	-0.0517766	6.74121	6.30972
1999.92	1	4.14	0.237248	0.769955	1.31196	5.3	6.28	2.6728	-0.0493696	6.74121	6.30972
2000	0	4.15	0.295771	0.017522	-0.335497	5.45	6.66	-0.216518	-0.0205843	1.44443	8.25236
2000.08	0	4.15	0.412615	0.296769	0.960567	5.73	6.52	-2.60953	0.0999726	1.44443	8.25236
2000.17	1	4.14	0.586512	0.361737	0.568607	5.85	6.26	3.76862	-0.0871248	1.44443	8.25236
2000.25	0	4.16	-0.0584966	0.717687	-0.123224	6.02	5.99	1.31908	-0.185469	7.2584	2.20091
2000.33	0	4.12	0.175387	0.170256	0.474092	6.27	6.44	-2.97816	0.204327	7.2584	2.20091
2000.42	1	4.13	0.582413	0.0959354	0.211973	6.53	6.1	3.01921	-0.0807969	7.2584	2.20091
2000.5	0	4.15	0.289939	-0.15126	0.05866	6.54	6.05	0.752314	0.076192	0.533865	3.19081
2000.58	0	4.1	0	-0.292716	0.528934	6.5	5.83	0.842335	0.0676897	0.533865	3.19081
2000.67	1	4.11	0.519782	0.385151	0.79574	6.52	5.8	-1.17895	-0.160095	0.533865	3.19081
2000.75	0	4.11	0.172662	-0.295171	-0.064182	6.51	5.74	-5.45305	-0.0666831	2.48383	-0.683498
2000.83	0	4.11	0.172364	0.027146	0.075504	6.51	5.72	-0.874226	0.064218	2.48383	-0.683498
2000.92	1	4.04	0.229358	-0.278728	0.494398	6.4	5.24	-3.47843	-0.0113656	2.48383	-0.683498
2001	0	4.06	0.571104	-0.645752	-0.00250347	5.98	5.16	0.352514	0.255417	-1.14234	4.71621
2001.08	0	4.05	0.227531	-0.641964	0.130098	5.49	5.1	-2.26255	0.0488143	-1.14234	4.71621
2001.17	1	4.05	0.056802	-0.234147	-0.118832	5.31	4.89	-9.63178	0.0295648	-1.14234	4.71621
2001.25	0	4.04	0.170213	-0.291932	0.0100124	4.8	5.14	0.335903	0.101099	2.33142	-0.546607
2001.33	0	4.04	0.508907	-0.612809	0.38721	4.21	5.39	6.54894	-0.0237489	2.33142	-0.546607
2001.42	1	4.03	0.225352	-0.59958	0.0112192	3.97	5.28	-2.52377	0.178788	2.33142	-0.546607
2001.5	0	4.06	-0.168967	-0.573016	0.196755	3.77	5.24	-2.80475	0.0595645	-1.66361	-1.86111
2001.58	0	4.03	0	-0.124051	0.526095	3.65	4.97	-2.17806	0.332176	-1.66361	-1.86111
2001.67	1	4.02	0.393812	-0.383152	-1.02746	3.07	4.73	-12.057	0.0453863	-1.66361	-1.86111
2001.75	0	4.01	-0.281136	-0.43608	2.38811	2.49	4.57	3.01263	0.379765	1.088	-2.10327
2001.83	0	4.01	-0.0563222	-0.491133	-0.501788	2.09	4.65	4.81358	0.208525	1.088	-2.10327
2001.92	1	4.02	-0.0563539	0.0235368	-0.178066	1.82	5.09	1.34091	0.17421	1.088	-2.10327
2002	0	4.01	0.168967	0.630114	0.298235	1.73	5.04	-0.413104	-0.0360367	3.48285	4.49046
2002.08	0	4.03	0.168682	-0.0264639	0.447521	1.74	4.91	-3.52934	-0.00745684	3.48285	4.49046
2002.17	1	4.05	0.280505	0.81235	-0.0146411	1.73	5.28	4.71331	0.0683606	3.48285	4.49046
2002.25	0	4.06	0.447178	0.412122	0.505098	1.75	5.21	-3.69549	0.194145	2.41562	3.36352
2002.33	0	4.06	0.111483	0.421882	-0.380717	1.75	5.16	-2.98309	-0.146722	2.41562	3.36352
2002.42	1	4.07	0.0556948	0.947031	0.364933	1.75	4.93	-6.23437	0.00105889	2.41562	3.36352
2002.5	0	4.04	0.22247	-0.239887	0.645097	1.73	4.65	-11.5302	-0.00187165	1.77434	0.466598
2002.58	0	4.05	0.277393	0.0130859	0.100083	1.74	4.26	0.986716	-0.0675377	1.77434	0.466598
2002.67	1	4.05	0.166067	0.138799	-0.318683	1.75	3.87	-5.02701	-0.0577767	1.77434	0.466598
2002.75	0	4.03	0.220995	-0.302496	0.350014	1.75	3.94	-1.53042	0.0478217	0.618812	2.73737
2002.83	0	4.04	0.165426	0.520647	0.289944	1.34	4.05	6.2699	0.157615	0.618812	2.73737
2002.92	1	4.05	0.165153	-0.491753	0.62395	1.24	4.03	-1.18844	0.0817086	0.618812	2.73737
2003	0	4.03	0.439079	0.759111	-0.00358168	1.24	4.05	-0.372141	-0.117774	2.21293	0.617742
2003.08	0	4.03	0.546151	0.142086	-0.356421	1.26	3.9	-6.79019	0.0605639	2.21293	0.617742
2003.17	1	4.04	0.163265	-0.23166	0.596111	1.25	3.81	1.14039	-0.017394	2.21293	0.617742
2003.25	0	4.01	-0.381368	-0.717449	0.496627	1.26	3.96	4.99914	0.155261	3.42632	3.4466
2003.33	0	4.02	-0.16389	0.0280408	0.228474	1.26	3.57	5.03176	0.077427	3.42632	3.4466
2003.42	1	4.03	0.10929	0.167222	0.565973	1.22	3.33	5.411	0.187008	3.42632	3.4466
2003.5	0	4.01	0.327154	0.439366	0.490272	1.01	3.98	0.458462	-0.149518	6.7358	4.01899
2003.58	0	4.02	0.434547	-0.142748	0.913121	1.03	4.45	-0.303723	-0.0768476	6.7358	4.01899
2003.67	1	4.05	0.324676	0.58689	-0.289106	1.01	4.27	2.97787	0.0135375	6.7358	4.01899
2003.75	0	4.06	-0.108108	0.141064	0.142916	1.01	4.29	1.87454	-0.136539	4.5665	3.08627
2003.83	0	4.09	0.0540687	0.767576	0.561549	1	4.3	1.06961	-0.117621	4.5665	3.08627
2003.92	1	4.07	0.269906	-0.0712329	0.140761	0.98	4.27	2.88585	-0.165741	4.5665	3.08627
2004	0	4.09	0.43034	0.255087	0.313115	1	4.15	4.68918	0.0317313	2.12931	3.43033
2004.08	0	4.1	0.214477	0.604007	0.171108	1.01	4.08	0.952606	-0.133202	2.12931	3.43033
2004.17	1	4.09	0.214018	-0.498604	0.533261	1	3.83	-1.70953	0.211589	2.12931	3.43033
2004.25	0	4.07	0.160214	0.450308	-0.0262532	1	4.35	0.831071	-0.214892	3.03675	4.94604
2004.33	0	4.11	0.425986	0.789547	0.593007	1	4.72	-2.73524	0.0204253	3.03675	4.94604
2004.42	1	4.08	0.371255	-0.827824	-0.484615	1.03	4.73	2.68229	0.0352255	3.03675	4.94604
2004.5	0	4.08	0.10582	0.767534	0.776976	1.26	4.5	-2.40429	-0.110389	3.76355	4.57045
2004.58	0	4.08	0.0528681	0.0736713	0.360308	1.43	4.28	-1.54095	-0.0941617	3.76355	4.57045
2004.67	1	4.07	0.316623	0.0841886	0.62267	1.61	4.13	2.60325	-0.0372637	3.76355	4.57045
2004.75	0	4.06	0.525487	0.947608	0.212661	1.76	4.1	-0.0402708	0.0769141	3.98676	2.12388
2004.83	0	4.05	0.470589	0.209514	0.166455	1.93	4.19	4.52628	-0.100651	3.98676	2.12388
2004.92	1	4.06	0	0.732962	0.669717	2.16	4.23	2.55657	0.00507514	3.98676	2.12388
2005	0	4.07	-0.0521785	0.459324	-0.260901	2.28	4.22	-1.49544	-0.100245	4.40353	4.13797
2005.08	0	4.06	0.416667	0.685405	0.420437	2.5	4.17	1.53045	0.120234	4.40353	4.13797
2005.17	1	4.04	0.363165	-0.158777	0.182489	2.63	4.5	-0.395068	-0.164735	4.40353	4.13797
2005.25	0	4.04	0.310238	0.168327	0.620179	2.79	4.34	-2.58308	-0.0623763	1.842	3.2803
2005.33	0	4.04	-0.0516396	0.130502	-0.0692076	3	4.14	1.18241	-0.0256314	1.842	3.2803
2005.42	1	4.04	0.0516396	0.382788	0.875289	3.04	4	2.01391	-0.084309	1.842	3.2803
2005.5	0	4.05	0.617604	-0.316647	0.768291	3.26	4.18	1.64904	-0.085511	3.54954	2.946
2005.58	0	4.05	0.613813	0.274832	-0.367132	3.5	4.26	0.165951	-0.0522087	3.54954	2.946
2005.67	1	4.07	1.36746	-1.8843	-0.352151	3.62	4.2	0.134683	0.132986	3.54954	2.946
2005.75	0	4.1	0.150792	1.25335	0.306572	3.78	4.46	-2.80926	-0.0682444	2.51791	6.31525
2005.83	0	4.09	-0.503526	1.00854	0.346748	4	4.54	3.73891	0.0731817	2.51791	6.31525
2005.92	1	4.08	0	0.618191	0.346628	4.16	4.47	1.97651	-0.190119	2.51791	6.31525
2006	0	4.1	0.603927	0.117818	0.513946	4.29	4.42	1.31142	-0.149072	5.28607	6.7812
2006.08	0	4.11	0.050163	0.00415575	0.282725	4.49	4.57	-0.162794	0.0663297	5.28607	6.7812
2006.17	1	4.11	0.150338	0.20579	0.181636	4.59	4.72	1.32978	-0.0797031	5.28607	6.7812
2006.25	0	4.13	0.499502	0.400284	0.150401	4.79	4.99	0.649486	0.0296998	0.933708	0.730709
2006.33	0	4.12	0.298508	-0.100659	0.190609	4.94	5.11	-0.938213	-0.0985455	0.933708	0.730709
2006.42	1	4.12	0.248078	0.383497	0.0372275	4.99	5.11	-2.89736	0.00517452	0.933708	0.730709
2006.5	0	4.14	0.543614	-0.0366844	0.52714	5.24	5.09	0.562584	0.114242	0.618053	1.76924
2006.58	0	4.12	0.442587	0.392433	-0.32529	5.25	4.88	2.11283	-0.0659574	0.618053	1.76924
2006.67	1	4.11	-0.491885	-0.202976	0.618942	5.25	4.72	2.34877	-0.15922	0.618053	1.76924
2006.75	0	4.12	-0.444775	-0.0572011	0.440967	5.25	4.73	3.40488	-0.09018	3.39303	1.37017
2006.83	0	4.1	0.0495172	-0.0960617	0.0377969	5.25	4.6	1.83579	0.0845444	3.39303	1.37017
2006.92	1	4.11	0.543077	1.03456	0.57777	5.24	4.56	1.98077	-0.0816459	3.39303	1.37017
2007	0	4.1	0.165791	-0.521501	0.14288	5.25	4.76	0.54496	0.219244	0.940865	-0.201421
2007.08	0	4.09	0.387085	1.00292	0.00416862	5.26	4.72	1.43887	-0.118653	0.940865	-0.201421
2007.17	1	4.13	0.518665	0.217775	0.0458434	5.26	4.56	-2.65467	-0.130074	0.940865	-0.201421
2007.25	0	4.13	0.299617	0.700467	0.107233	5.25	4.69	3.95022	0.0958382	2.28495	1.04172
2007.33	0	4.12	0.412448	0.0486093	0.0915256	5.25	4.75	3.19378	-0.0619377	2.28495	1.04172
2007.42	1	4.14	0.231407	0.028217	-0.0447123	5.25	5.1	0.201631	0.128435	2.28495	1.04172
2007.5	0	4.13	0.177901	-0.0373055	0.275235	5.26	5	0.429669	0.110685	2.1672	-3.1282
2007.58	0	4.13	0.0308233	0.222575	0.39026	5.02	4.67	-4.44326	-0.0443563	2.1672	-3.1282
2007.67	1	4.13	0.42286	0.386344	0.0764242	4.94	4.52	2.87986	0.047084	2.1672	-3.1282
2007.75	0	4.12	0.307849	-0.423103	0.0134198	4.76	4.53	2.80184	0.0507864	2.42401	-0.477102
2007.83	0	4.13	0.782816	0.587193	0.197991	4.49	4.15	-5.0806	-0.0180734	2.42401	-0.477102
2007.92	1	4.11	0.289382	0.0112968	-0.12473	4.24	4.1	1.07593	0.260589	2.42401	-0.477102
2008	0	4.11	0.344178	-0.269762	-0.0484909	3.94	3.74	-7.03304	0.0212887	-2.30543	0.122506
2008.08	0	4.12	0.241491	-0.336081	-0.378416	2.98	3.74	-1.7479	-0.109043	-2.30543	0.122506
2008.17	1	4.13	0.357164	-0.236935	0.154228	2.61	3.51	-2.83946	0.203081	-2.30543	0.122506
2008.25	0	4.11	0.231171	-0.76029	0.162251	2.28	3.68	3.98429	-0.115716	2.06023	-0.844487
2008.33	0	4.1	0.590005	-0.565013	0.121774	1.98	3.88	2.36158	0.474053	2.06023	-0.844487
2008.42	1	4.1	1.04237	-0.234836	-0.174451	2	4.1	-4.51676	0.116293	2.06023	-0.844487
2008.5	0	4.09	0.711607	-0.530651	-0.460814	2.01	4.01	-6.46116	0.228739	-2.1713	-1.61266
2008.58	0	4.09	-0.148958	-1.54153	-0.014532	2	3.89	1.90174	0.317541	-2.1713	-1.61266
2008.67	1	4.05	0.0854726	-4.43366	-0.616437	1.81	3.69	-5.16601	0.039033	-2.1713	-1.61266
2008.75	0	4.05	-0.863562	0.946664	-0.219585	0.97	3.81	-22.8045	0.362358	-8.75026	-8.47741
2008.83	0	4.01	-1.78641	-1.26481	-0.258892	0.39	3.53	-9.26877	0.310023	-8.75026	-8.47741
2008.92	1	3.98	-0.826761	-2.96716	-0.381698	0.16	2.42	-0.622517	0.482952	-8.75026	-8.47741
2009	0	3.97	0.252757	-2.40373	0.505463	0.15	2.52	-1.37455	0.521674	-4.51618	-6.60762
2009.08	0	3.96	0.363604	-0.646989	-0.384382	0.22	2.87	-7.22719	0.52696	-4.51618	-6.60762
2009.17	1	3.93	-0.0987771	-1.59833	-0.403824	0.18	2.82	-6.1593	0.364492	-4.51618	-6.60762
2009.25	0	3.95	0.100658	-0.80126	-0.0930154	0.15	2.93	11.3523	0.255162	-0.576374	1.70564
2009.33	0	3.93	0.147041	-1.01309	0.125762	0.18	3.29	6.20115	0.403666	-0.576374	1.70564
2009.42	1	3.96	0.826536	-0.391198	0.00316842	0.21	3.72	2.59349	0.136317	-0.576374	1.70564
2009.5	0	3.99	-0.029801	1.09432	0.348967	0.16	3.56	1.04193	-0.0554411	1.4538	1.58604
2009.58	0	4	0.334286	1.1146	0.915631	0.16	3.59	7.60151	0.149979	1.4538	1.58604
2009.67	1	4	0.192903	0.753844	-0.949315	0.15	3.4	3.39032	0.156723	1.4538	1.58604
2009.75	0	4.02	0.299743	0.319582	0.106276	0.12	3.39	2.18832	0.225768	4.36958	5.14437
2009.83	0	4.05	0.3343	0.396857	-0.161037	0.12	3.4	1.89361	-0.0925304	4.36958	5.14437
2009.92	1	4.06	0.0520041	0.304724	0.542069	0.12	3.59	2.02968	-0.0294828	4.36958	5.14437
2010	0	4.08	0.0648522	1.1532	-0.169868	0.11	3.73	1.18177	-0.0578437	1.53617	1.93751
2010.08	0	4.05	-0.095223	0.359146	0.303882	0.13	3.69	-3.11133	0.0301988	1.53617	1.93751
2010.17	1	4.1	0.0331313	0.655822	0.458264	0.16	3.73	5.61362	0.0412031	1.53617	1.93751
2010.25	0	4.11	0.0230014	0.371128	0.19457	0.2	3.85	3.85428	0.0368894	3.67121	4.5838
2010.33	0	4.14	-0.0519907	1.44852	0.157875	0.2	3.42	-6.22494	-0.274754	3.67121	4.5838
2010.42	1	4.1	-0.0418883	0.148353	0.257051	0.18	3.2	-3.7769	-0.214318	3.67121	4.5838
2010.5	0	4.11	0.186751	0.437311	0.240903	0.18	3.01	-0.329148	0.020127	2.93803	6.2382
2010.58	0	4.12	0.14603	0.306529	0.29285	0.19	2.7	0.690333	0.064057	2.93803	6.2382
2010.67	1	4.15	0.161395	0.229806	0.110112	0.19	2.65	3.15049	-0.0379594	2.93803	6.2382
2010.75	0	4.12	0.34758	-0.265442	0.246541	0.19	2.54	4.31692	-0.0200523	2.00259	1.02083
2010.83	0	4.13	0.253064	0.0288043	0.295049	0.19	2.76	2.30429	0.336547	2.00259	1.02083
2010.92	1	4.13	0.400853	0.964033	0.13494	0.18	3.29	3.49484	-0.446809	2.00259	1.02083
2011	0	4.11	0.323779	-0.128648	0.0878178	0.17	3.39	3.25604	-0.194999	-0.962923	0.22541
2011.08	0	4.14	0.320932	-0.439798	0.0418395	0.16	3.58	2.9575	-0.123044	-0.962923	0.22541
2011.17	1	4.14	0.516021	0.98855	0.361539	0.14	3.41	-1.26677	-0.0636426	-0.962923	0.22541
2011.25	0	4.14	0.468312	-0.358911	-0.0671168	0.1	3.46	2.05015	0.133541	2.84972	3.00704
2011.33	0	4.15	0.317666	0.227584	-0.0753058	0.09	3.17	0.509399	-0.0626681	2.84972	3.00704
2011.42	1	4.14	0	0.287842	0.251138	0.09	3	-3.88684	0.0776064	2.84972	3.00704
2011.5	0	4.14	0.261661	0.53039	0.197822	0.07	3	2.90166	-0.126376	-0.11113	1.54383
2011.58	0	4.13	0.31495	0.558414	-0.0253399	0.1	2.3	-11.1552	0.00820848	-0.11113	1.54383
2011.67	1	4.13	0.216919	-0.0242676	0.20254	0.08	1.98	-0.968984	0.0627124	-0.11113	1.54383
2011.75	0	4.15	0.067498	0.686633	0.133452	0.07	2.15	2.80057	-0.219936	4.61047	3.57503
2011.83	0	4.15	0.184614	-0.0802786	-0.146605	0.08	2.01	1.57792	-0.19902	4.61047	3.57503
2011.92	1	4.16	0.023768	0.552504	0.06069	0.07	1.98	1.36859	-0.128265	4.61047	3.57503
2012	0	4.18	0.272049	0.610457	0.474135	0.08	1.97	4.50251	-0.212992	3.11977	8.30564
2012.08	0	4.17	0.213517	0.22893	0.59903	0.1	1.97	3.9137	-0.00519734	3.11977	8.30564
2012.17	1	4.16	0.209128	-0.468067	-0.197273	0.13	2.17	2.68095	-0.0687963	3.11977	8.30564
2012.25	0	4.17	0.165941	0.74904	0.120213	0.14	2.05	-0.202474	-0.0325089	1.71712	1.48284
2012.33	0	4.16	-0.207032	0.191807	0.0160175	0.16	1.8	-3.31152	-0.00792076	1.71712	1.48284
2012.42	1	4.17	-0.0826705	-0.0195838	-0.150264	0.16	1.62	-1.33523	0.0091955	1.71712	1.48284
2012.5	0	4.17	0.0288768	0.262065	0.245315	0.16	1.53	2.70583	-0.0161032	0.539429	-2.22495
2012.58	0	4.15	0.579272	-0.478943	-0.088044	0.13	1.68	3.16106	-0.109774	0.539429	-2.22495
2012.67	1	4.15	0.475992	0.0489585	0.212973	0.14	1.72	2.80818	-0.250058	0.539429	-2.22495
2012.75	0	4.15	0.269316	0.211777	0.0539213	0.16	1.75	-0.388722	-0.0139911	0.455234	3.79402
2012.83	0	4.15	-0.168076	0.480681	0.399508	0.16	1.65	-3.0585	-0.0657693	0.455234	3.79402
2012.92	1	4.17	-0.0121089	0.352364	0.0427455	0.16	1.72	1.97251	0.173868	0.455234	3.79402
2013	0	4.17	0.197883	-0.132623	0.372998	0.14	1.91	4.00441	0.104217	3.5271	0.440376
2013.08	0	4.18	0.541524	0.572744	-0.0366429	0.15	1.98	2.1326	-0.312205	3.5271	0.440376
2013.17	1	4.19	-0.281588	0.405392	0.020799	0.14	1.96	2.5152	-0.153143	3.5271	0.440376
2013.25	0	4.18	-0.209016	-0.172034	-0.11891	0.15	1.76	1.27311	0.0268127	0.493282	2.38576
2013.33	0	4.18	0.041407	0.10935	0.285146	0.11	1.93	4.30773	-0.0750607	0.493282	2.38576
2013.42	1	4.18	0.237758	0.203532	-0.00296608	0.09	2.3	-1.29321	0.0520327	0.493282	2.38576
2013.5	0	4.17	0.195554	-0.42708	0.1245	0.09	2.58	3.03663	-0.260081	3.12145	0.305493
2013.58	0	4.19	0.238445	0.658091	0.137165	0.08	2.74	0.0844622	-0.0362695	3.12145	0.305493
2013.67	1	4.19	0.0376874	0.513696	0.290485	0.08	2.81	1.01751	-0.00959859	3.12145	0.305493
2013.75	0	4.19	0.0535088	-0.175295	0.301408	0.09	2.62	1.92892	-0.039178	3.18032	2.81
2013.83	0	4.2	0.184279	0.292928	0.442119	0.08	2.72	3.62584	-0.252228	3.18032	2.81
2013.92	1	4.19	0.264068	0.303416	0.06732	0.09	2.9	1.34994	-0.243091	3.18032	2.81
2014	0	4.16	0.242124	-0.41657	-0.309657	0.07	2.86	0.803279	-0.137364	-1.13242	2.06204
2014.08	0	4.16	0.110017	0.843479	0.561947	0.07	2.71	-0.292356	0.0890111	-1.13242	2.06204
2014.17	1	4.2	0.203997	0.958022	0.406803	0.08	2.72	2.52584	-0.00338105	-1.13242	2.06204
2014.25	0	4.19	0.186245	0.0460746	0.352065	0.09	2.71	0.0397019	-0.408163	5.3784	5.90436
2014.33	0	4.21	0.19012	0.360693	0.209297	0.09	2.56	1.35909	0.0882106	5.3784	5.90436
2014.42	1	4.21	0.132026	0.373438	0.417284	0.1	2.6	2.98808	-0.257186	5.3784	5.90436
2014.5	0	4.19	0.112485	0.196755	0.236711	0.09	2.54	1.327	0.0831844	4.85416	4.98758
2014.58	0	4.2	-0.0160014	-0.110935	0.698236	0.09	2.42	-0.588113	-0.0106163	4.85416	4.98758
2014.67	1	4.22	0.00715884	0.298326	0.0589169	0.09	2.53	1.60317	-0.212424	4.85416	4.98758
2014.75	0	4.21	-0.0197933	0.0206946	0.608987	0.09	2.3	-2.84767	-0.1882	2.24486	3.37028
2014.83	0	4.22	-0.188443	0.779019	0.344049	0.09	2.33	5.39077	0.0610723	2.24486	3.37028
2014.92	1	4.21	-0.308938	-0.145329	0.287527	0.12	2.21	0.473306	-0.232576	2.24486	3.37028
2015	0	4.2	-0.639069	-0.496874	0.274539	0.11	1.88	-1.27817	0.0822008	3.12703	2.48193
2015.08	0	4.2	0.253144	-0.509028	0.249522	0.11	1.98	2.62862	-0.168637	3.12703	2.48193
2015.17	1	4.19	0.269033	-0.281212	0.240521	0.11	2.04	-0.106194	-0.0535901	3.12703	2.48193
2015.25	0	4.18	0.104194	-0.590634	0.291021	0.12	1.94	0.712364	0.00785189	2.9545	1.28978
2015.33	0	4.18	0.329232	-0.434322	0.350331	0.12	2.2	0.812023	0.159737	2.9545	1.28978
2015.42	1	4.18	0.27641	-0.343421	0.0730626	0.13	2.36	-0.600776	-0.352724	2.9545	1.28978
2015.5	0	4.18	0.158506	0.583442	0.391224	0.13	2.32	-0.245622	-0.0487825	1.32044	0.797711
2015.58	0	4.18	-0.000420109	-0.155598	0.238228	0.14	2.17	-2.62569	-0.117135	1.32044	0.797711
2015.67	1	4.17	-0.225012	-0.37059	0.132206	0.14	2.17	-4.74133	-0.0399899	1.32044	0.797711
2015.75	0	4.18	0.0988993	-0.366069	0.0220173	0.12	2.07	6.26457	-0.00438693	0.130081	0.684738
2015.83	0	4.18	0.11939	-0.690012	0.23089	0.12	2.26	0.454743	0.0400603	0.130081	0.684738
2015.92	1	4.18	-0.107613	-0.571519	0.309763	0.24	2.24	-1.28379	-0.0772366	0.130081	0.684738
2016	0	4.19	0.0277551	0.830128	0.159533	0.34	2.09	-6.82323	-0.127168	2.00852	2.0828
2016.08	0	4.19	-0.131695	-0.711591	0.624735	0.38	1.78	-0.81484	0.00619916	2.00852	2.0828
2016.17	1	4.18	0.200209	-0.792587	-0.2438	0.36	1.89	6.0615	0.111267	2.00852	2.0828
2016.25	0	4.18	0.354428	0.0997378	0.349654	0.37	1.81	2.6159	0.0227022	1.87698	-1.76056
2016.33	0	4.18	0.252993	-0.0856383	0.246558	0.37	1.81	-0.482483	-0.187212	1.87698	-1.76056
2016.42	1	4.18	0.293588	0.437669	0.467061	0.38	1.64	0.88398	0.0685763	1.87698	-1.76056
2016.5	0	4.2	-0.0137427	0.252736	0.0466761	0.39	1.5	3.07197	-0.0850578	2.1633	1.99441
2016.58	0	4.18	0.201371	-0.0899237	0.104045	0.4	1.56	1.32122	0.0808718	2.1633	1.99441
2016.67	1	4.19	0.196403	0.00685977	0.376706	0.4	1.63	-0.913004	0.0915757	2.1633	1.99441
2016.75	0	4.19	0.23741	0.196577	0.0696379	0.4	1.76	-0.682216	-0.0850554	2.00583	1.35653
2016.83	0	4.18	0.145565	-0.193638	0.183683	0.41	2.14	1.01997	-0.206851	2.00583	1.35653
2016.92	1	4.19	0.296676	0.856094	0.421371	0.54	2.49	3.70156	-0.000289362	2.00583	1.35653
2017	0	4.19	0.413216	0.105358	0.0780343	0.65	2.43	1.26015	0.0162587	2.26074	3.76482
2017.08	0	4.19	0.127526	-0.377958	0.0053183	0.66	2.42	2.37968	-0.0780205	2.26074	3.76482
2017.17	1	4.18	-0.125884	0.674887	0.508363	0.79	2.48	0.686506	-0.202946	2.26074	3.76482
2017.25	0	4.19	0.138177	0.895028	0.0960772	0.9	2.3	0.56745	-0.00858371	2.1319	2.59774
2017.33	0	4.19	-0.0541001	0.13494	0.103906	0.91	2.3	1.51602	-0.0093685	2.1319	2.59774
2017.42	1	4.2	0.103666	0.164595	0.261928	1.04	2.19	1.60025	-0.0833701	2.1319	2.59774
2017.5	0	4.2	0.0610022	-0.0403581	0.10265	1.15	2.32	0.822821	-0.0440503	3.15075	0.806276
2017.58	0	4.2	0.398667	-0.474807	0.100793	1.16	2.21	0.0863488	0.133778	3.15075	0.806276
2017.67	1	4.19	0.464059	0.00259493	0.615693	1.15	2.2	1.4799	-0.173098	3.15075	0.806276
2017.75	0	4.2	0.0507084	1.50566	0.246088	1.15	2.36	2.54121	-0.128827	3.48423	2.67273
2017.83	0	4.2	0.308968	0.532808	0.448874	1.16	2.35	1.4216	0.0576716	3.48423	2.67273
2017.92	1	4.18	0.207601	0.322476	0.432234	1.3	2.4	2.69056	-0.0854429	3.48423	2.67273
2018	0	4.18	0.390205	-0.254228	-0.0783709	1.41	2.58	4.60135	-0.000410062	2.51987	4.55042
2018.08	0	4.22	0.264504	0.353581	-0.0810191	1.42	2.86	-3.08088	0.0184084	2.51987	4.55042
2018.17	1	4.22	-0.0248553	0.570378	0.335715	1.51	2.84	-0.0883887	-0.0890231	2.51987	4.55042
2018.25	0	4.24	0.217875	0.900717	0.429618	1.69	2.87	-1.83487	-0.0478102	3.45351	0.711775
2018.33	0	4.2	0.272874	-0.796345	0.426928	1.7	2.98	1.7875	-0.132349	3.45351	0.711775
2018.42	1	4.21	0.213624	0.748654	0.216183	1.82	2.91	1.9378	0.181704	3.45351	0.711775
2018.5	0	4.22	0.121753	0.443958	0.357293	1.91	2.89	1.41639	-0.206658	2.88417	3.22914
2018.58	0	4.22	0.168062	0.799907	0.32816	1.91	2.89	2.27137	0.00150433	2.88417	3.22914
2018.67	1	4.21	0.141223	0.137135	-0.0287133	1.95	3	1.51687	-0.0825639	2.88417	3.22914
2018.75	0	4.2	0.204341	0.220045	0.387777	2.19	3.15	-4.08148	0.0358812	1.08386	0.7751
2018.83	0	4.2	-0.045505	0.535517	0.255447	2.2	3.12	-2.25944	-0.0560342	1.08386	0.7751
2018.92	1	4.2	-0.00356213	0.0406228	-0.876614	2.27	2.83	-5.896	0.144285	1.08386	0.7751
2019	0	4.2	-0.0407757	-0.392532	0.641358	2.4	2.71	1.54911	0.140249	3.04918	3.19297
2019.08	0	4.17	0.24954	-0.505642	-0.166695	2.4	2.68	5.50169	-0.203135	3.04918	3.19297
2019.17	1	4.17	0.360356	0.107643	0.756311	2.41	2.57	1.76732	0.0105845	3.04918	3.19297
2019.25	0	4.16	0.333178	-0.633194	0.369773	2.42	2.53	3.49804	-0.202535	1.99381	0.867307
2019.33	0	4.15	0.0878242	0.217767	0.339353	2.39	2.4	-1.705	0.0488423	1.99381	0.867307
2019.42	1	4.16	0.0920542	0.0466811	0.207369	2.38	2.07	1.23451	0.0209621	1.99381	0.867307
2019.5	0	4.15	0.267846	-0.176038	0.309424	2.4	2.06	3.59995	0.0203185	2.08169	1.222
2019.58	0	4.15	0.0807993	0.702571	0.233501	2.13	1.63	-3.34665	-0.0288114	2.08169	1.222
2019.67	1	4.15	0.116595	-0.348157	0.176209	2.04	1.7	2.87996	-0.153456	2.08169	1.222
2019.75	0	4.14	0.247557	-0.407782	0.067437	1.83	1.71	-0.15034	0.0557941	2.10433	2.55852
2019.83	0	4.14	0.231044	0.936197	0.236492	1.55	1.81	4.1837	-0.026819	2.10433	2.55852
2019.92	1	4.14	0.240185	-0.398239	0.0991929	1.55	1.86	2.28772	-0.0397371	2.10433	2.55852
